# Supplementary material for: Short-Term Effects of the EU Nitrate Directive Reintroduction: Reduced N Loads to River from an Alluvial Aquifer in Northern Italy
Source: MDPI journal article supplement (doi:10.3390/hydrology9030044), 2022-02-25
Supplement: s1 [file s1]

## Article

# Short-Term Effects of the EU Nitrate Directive Reintroduction: Reduced N Loads to River from an Alluvial Aquifer in Northern Italy

Edoardo Severini <sup>1,\*</sup>, Marco Bartoli <sup>1,2</sup>, Monica Pinardi <sup>3</sup> and Fulvio Celico <sup>1</sup>

<sup>1</sup> Department of Chemistry, Life Science and Environmental Sustainability, University of Parma, Parco Area delle Scienze 11/a, 43124 Parma, Italy; edoardo.severini@unipr.it (E.S.); marco.bartoli@unipr.it (M.B.); fulvio.celico@unipr.it (F.C.)

<sup>2</sup> Marine Science and Technology Center, Klaipeda University, Herkaus Manto 84, 92294 Klaipeda, Lithuania

<sup>3</sup> Institute for Electromagnetic Sensing of the Environment, National Research Council of Italy (CNR-IREA), 20133 Milan, Italy; pinardi.m@irea.cnr.it (M.P.)

\* Correspondence: edoardo.severini@unipr.it

**Citation:** Severini, E.; Bartoli, M.; Pinardi, M.; Celico, F. Short-Term Effects of the EU Nitrate Directive Reintroduction: Reduced N Loads to River from an Alluvial Aquifer in Northern Italy. *Hydrology* **2022**, *9*, 44. <https://doi.org/10.3390/hydrology9030044>

Academic Editor: Ryan Bailey

Received: 18 January 2022

Accepted: 23 February 2022

Published: 25 February 2022

**Publisher's Note:** MDPI stays neutral with regard to jurisdictional claims in published maps and institutional affiliations.

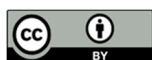

**Copyright:** © 2022 by the authors. Submitted for possible open access publication under the terms and conditions of the Creative Commons Attribution (CC BY) license (<https://creativecommons.org/licenses/by/4.0/>).

**Table S1.** NO<sub>3</sub><sup>−</sup> concentrations (mg L<sup>−1</sup>) during the investigated period, from June 2020 to May 2021. NA represents not analysed samples, due to dry conditions (e.g. c17) or inaccessibility to the sampling point (e.g. absent owner).

| Sampling point | Jun    | Jul    | Aug    | Sep    | Oct    | Nov    | Dec    | Jan    | Feb    | Mar    | Apr    | May    |
|----------------|--------|--------|--------|--------|--------|--------|--------|--------|--------|--------|--------|--------|
| c12            | 5.603  | 7.321  | 7.011  | 3.843  | 3.130  | 3.483  | 10.412 | 4.534  | 2.741  | 3.546  | 8.567  | 2.613  |
| c16            | 2.104  | 2.401  | 1.516  | 1.835  | 3.268  | 3.228  | 3.263  | 2.806  | 2.741  | 5.730  | 2.912  | 1.252  |
| c23            | 5.751  | 10.925 | 9.224  | 5.264  | 8.558  | 2.847  | 8.971  | 4.820  | 3.292  | 3.610  | 8.163  | 2.359  |
| c4             | 2.677  | 3.419  | 3.175  | 1.512  | 2.568  | 2.571  | 3.500  | 2.339  | 2.083  | 2.783  | 3.737  | 0.637  |
| c5             | 15.421 | 12.176 | 15.617 | 10.586 | 12.333 | NA     | 32.797 | 21.953 | 15.739 | 14.085 | 14.882 | 11.536 |
| c17            | 17.880 | 7.278  | 12.493 | 11.222 | NA     |
| f2             | 10.353 | 8.063  | 24.032 | 9.823  | 14.156 | NA     | 47.498 | 15.533 | 4.797  | 4.691  | 14.583 | 13.924 |
| f4             | 3.122  | 10.013 | 23.977 | 6.108  | 14.765 | 10.480 | 67.169 | 18.873 | 11.371 | 17.138 | 59.924 | 37.012 |
| p10            | 16.035 | 12.240 | 23.696 | 12.119 | 14.570 | 15.039 | 36.907 | 13.906 | 5.582  | 13.088 | 28.072 | 24.375 |
| p11            | 14.085 | 13.427 | 15.547 | 10.183 | 11.760 | 12.685 | 26.228 | 15.369 | 7.681  | 13.533 | 28.766 | 20.783 |
| p12            | 4.161  | 3.631  | 5.353  | 2.996  | 4.434  | NA     | 15.971 | 5.954  | 6.197  | 11.052 | 6.381  | 2.183  |
| p13            | 24.899 | 22.630 | 71.399 | 53.971 | 23.115 | 42.901 | 88.342 | 65.235 | 19.280 | 39.678 | 63.832 | 35.203 |
| p16            | 39.614 | 9.250  | 17.127 | 11.625 | 17.526 | 8.656  | 25.595 | 18.269 | 7.172  | 17.265 | 75.538 | 52.073 |
| p23            | 47.693 | 14.700 | 37.477 | 12.199 | 5.021  | 5.094  | 12.150 | 15.236 | 12.579 | 19.364 | 15.690 | 4.730  |
| p26            | 29.839 | 23.160 | 31.038 | 17.477 | 15.322 | 21.336 | 95.034 | 33.392 | 10.819 | NA     | 42.088 | 10.043 |
| p4             | 20.552 | 14.360 | 37.767 | 15.883 | 48.193 | NA     | 37.179 | 22.138 | 8.720  | 16.014 | 30.215 | 23.286 |
| p6             | 11.879 | 10.374 | 21.986 | 12.024 | 9.184  | 7.914  | 14.144 | 11.515 | 7.363  | 14.339 | 31.435 | 13.556 |
| p8             | 11.201 | 3.758  | 13.053 | 5.562  | 7.975  | NA     | 26.403 | 23.267 | NA     | NA     | 13.468 | 10.535 |
| p9             | 18.877 | 6.854  | 4.036  | 11.265 | 9.067  | NA     | 33.482 | NA     | NA     | NA     | 2.719  | 9.410  |

**Table S2.** NO<sub>3</sub><sup>−</sup> concentrations (mg L<sup>−1</sup>) during autumn 2019. Cumulated monthly precipitations are expressed in mm.

| Month         | Sep    | Oct     | Nov    | Dec    | Jan    | Feb    |
|---------------|--------|---------|--------|--------|--------|--------|
| Precipitation | 117.6  | 52.4    | 215    | 92     | 16.8   | 6.2    |
| f2            | NA     | NA      | NA     | 22.906 | 3.461  | 7.321  |
| f4            | NA     | NA      | NA     | 23.088 | 25.280 | 14.063 |
| p10           | 19.932 | 16.494  | 12.840 | 13.606 | 14.806 | 18.219 |
| p11           | 21.280 | 29.368  | 32.533 | 29.015 | 6.154  | 19.004 |
| p12           | 6.218  | 18.574  | 7.233  | 8.392  | 17.350 | 6.727  |
| p13           | 95.342 | 101.974 | 74.536 | 62.371 | 4.712  | 52.315 |
| p16           | 26.779 | 27.082  | 31.527 | 20.805 | 15.208 | 12.134 |
| p23           | 64.181 | 46.267  | 42.584 | 23.975 | 17.202 | 15.208 |
| p26           | NA     | NA      | NA     | NA     | NA     | NA     |
| p4            | NA     | NA      | NA     | NA     | NA     | 16.247 |
| p6            | 40.767 | 33.051  | 16.191 | 15.242 | 7.299  | 14.106 |

|    |        |        |        |        |    |    |
|----|--------|--------|--------|--------|----|----|
| p8 | 18.242 | 7.898  | 25.656 | 23.925 | NA | NA |
| p9 | 34.145 | 31.693 | 30.745 | NA     | NA | NA |

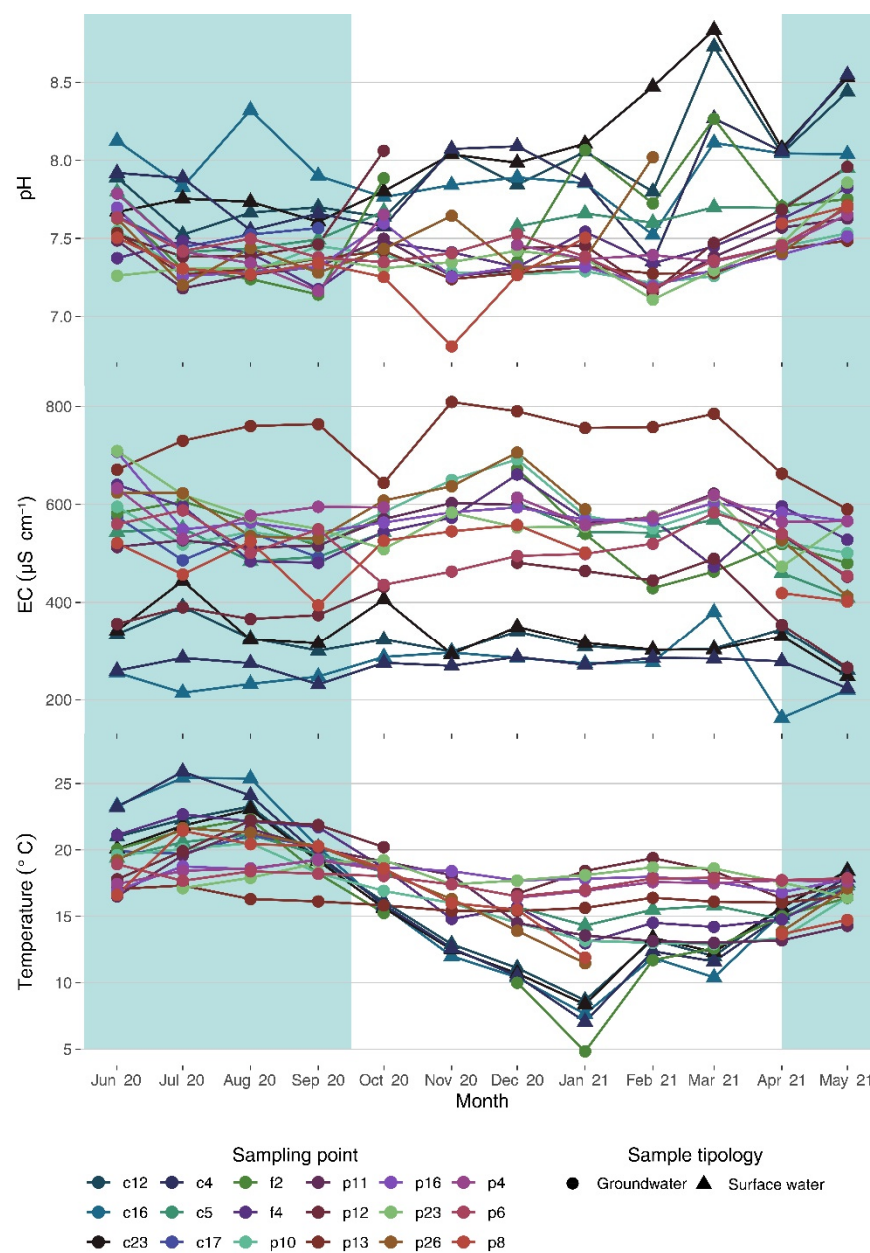

**Figure S1.** Ephemeral physico-chemical parameters. Variation of the ephemeral (measured on the field) physico-chemical parameters among the hydrological year. The shaded area includes the irrigation period.

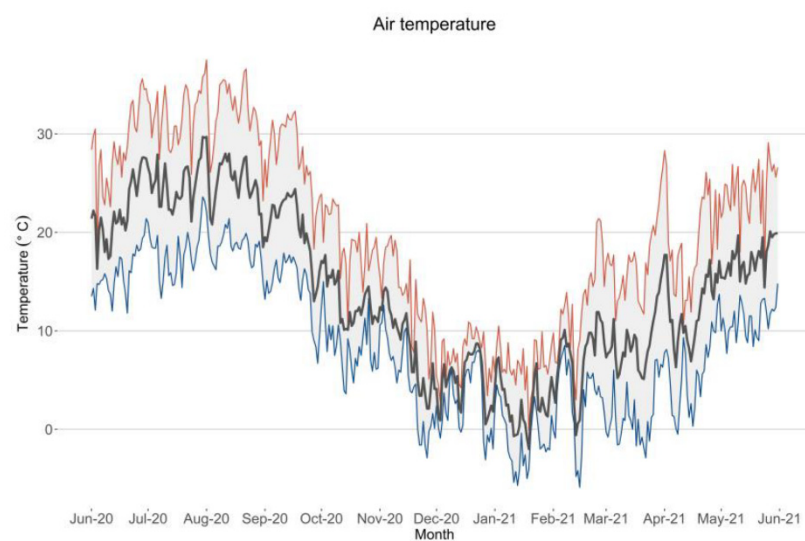

**Figure S2.** Air temperature. Average air temperature (black line), max temperature (red line) and min temperature (blue line) measured at the Goito meteorological station.

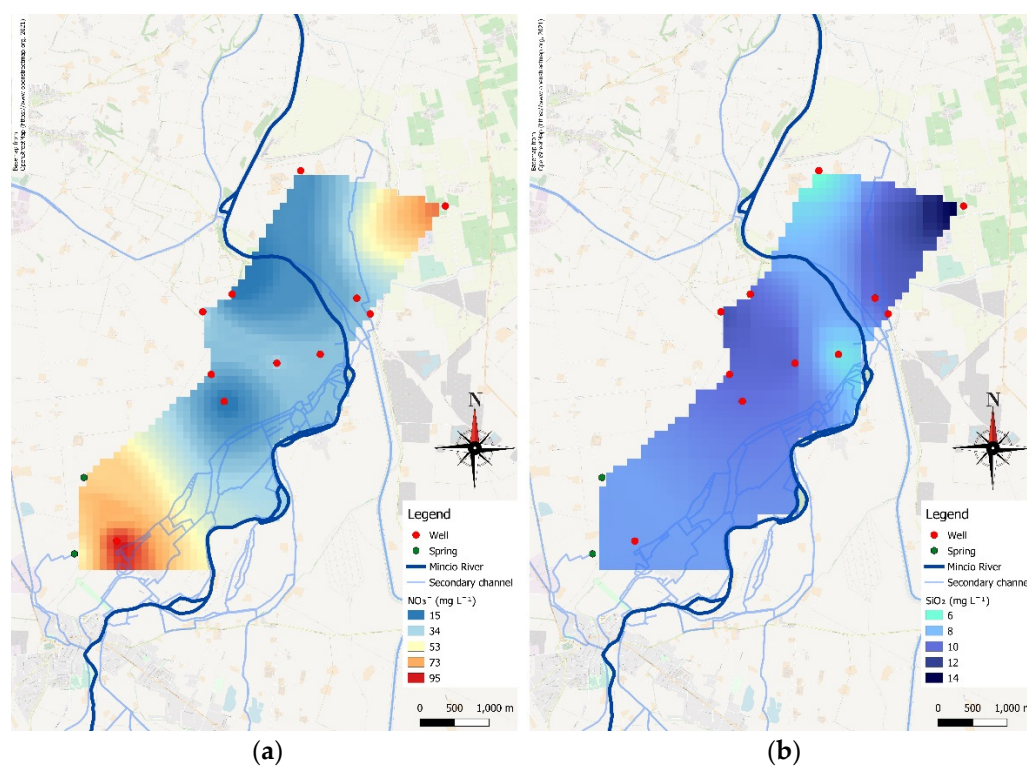

**Figure S3.**  $\text{NO}_3^-$  and  $\text{SiO}_2$  concentrations in the study area during December 2020. (a)  $\text{NO}_3^-$  concentrations; (b)  $\text{SiO}_2$  concentrations.

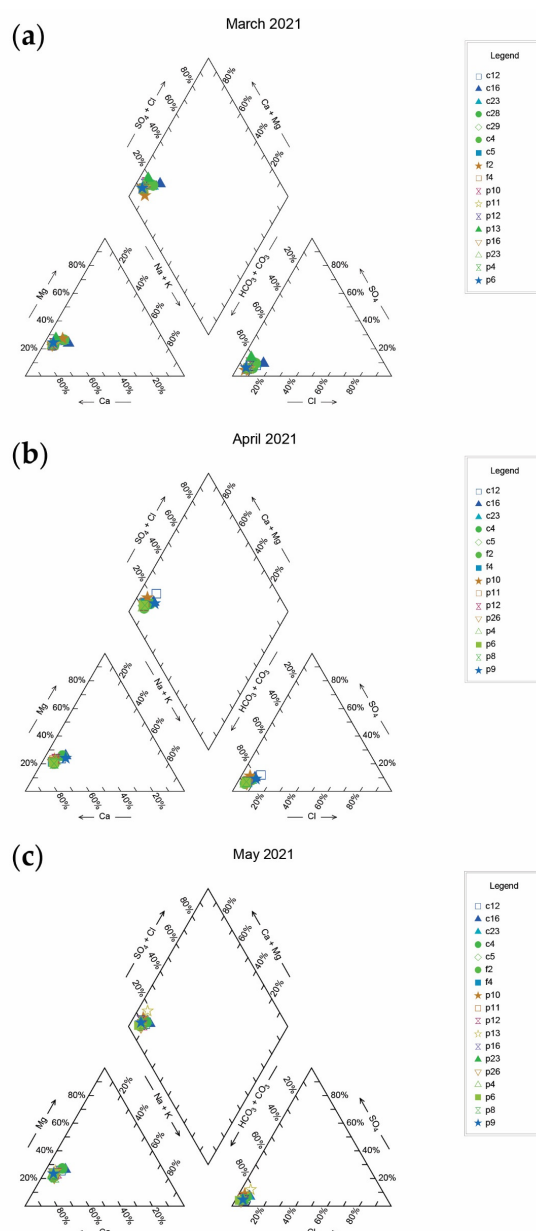

Figure S4. Piper plot. (a) March; (b) April; (c) May.

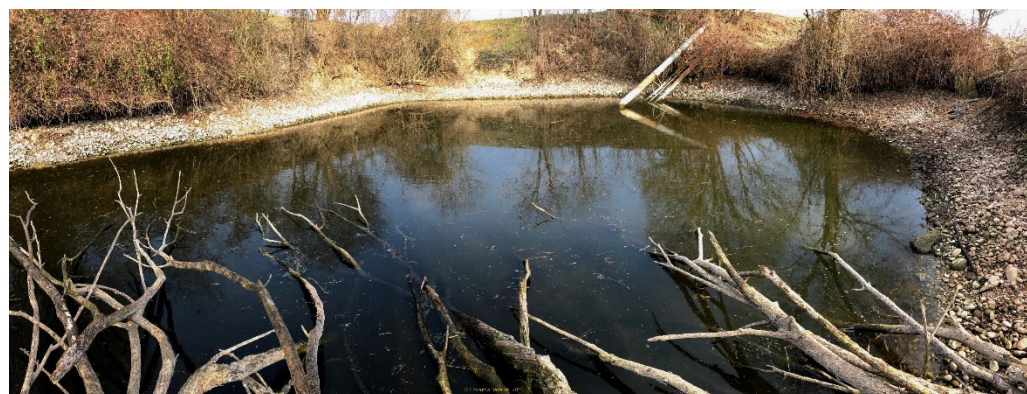

Figure S5. The spring f2. The pipes in the background are used to pump water for the irrigation.
